# Supplementary material for: Rapid18F-radiolabeling of peptides from [18F]fluoride using a single microfluidics device
Source: Royal Society of Chemistry journal article supplement (doi:10.1039/c4ra10520f), 2014-01-01
Supplement: c4ra10520f1.pdf [file c4ra10520f1.pdf]

### **Supplemental Information**

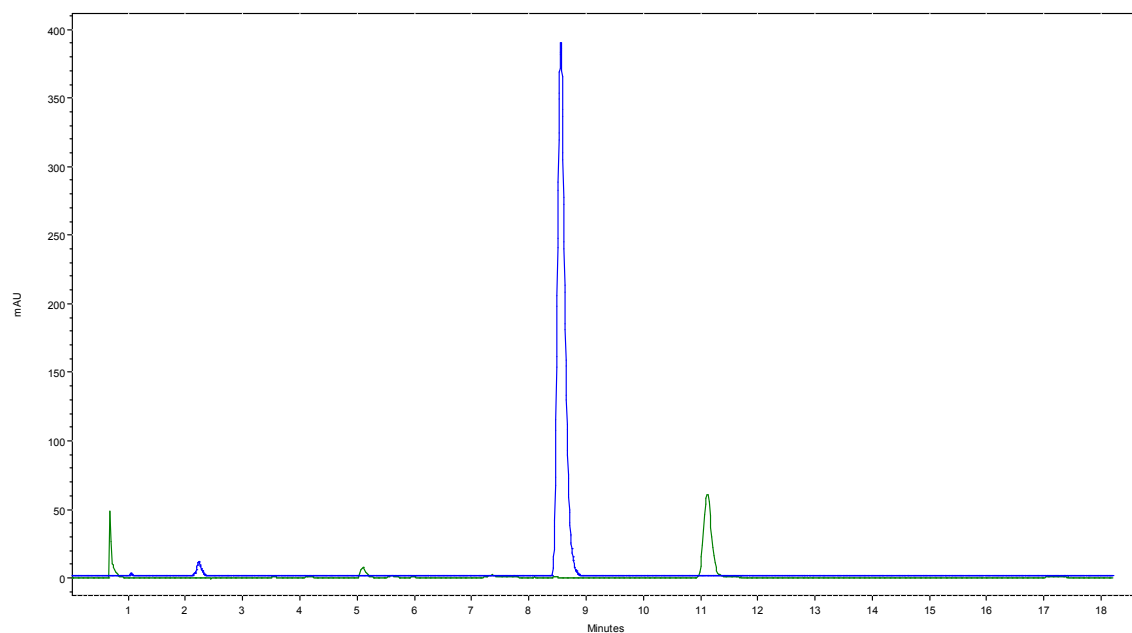

Figure 1: RadioHPLC chromatogram of [ $^{18}\text{F}$ ]F-Py-TFP prosthetic group. Radioactive peak is in blue, and UV at 254 is in green.

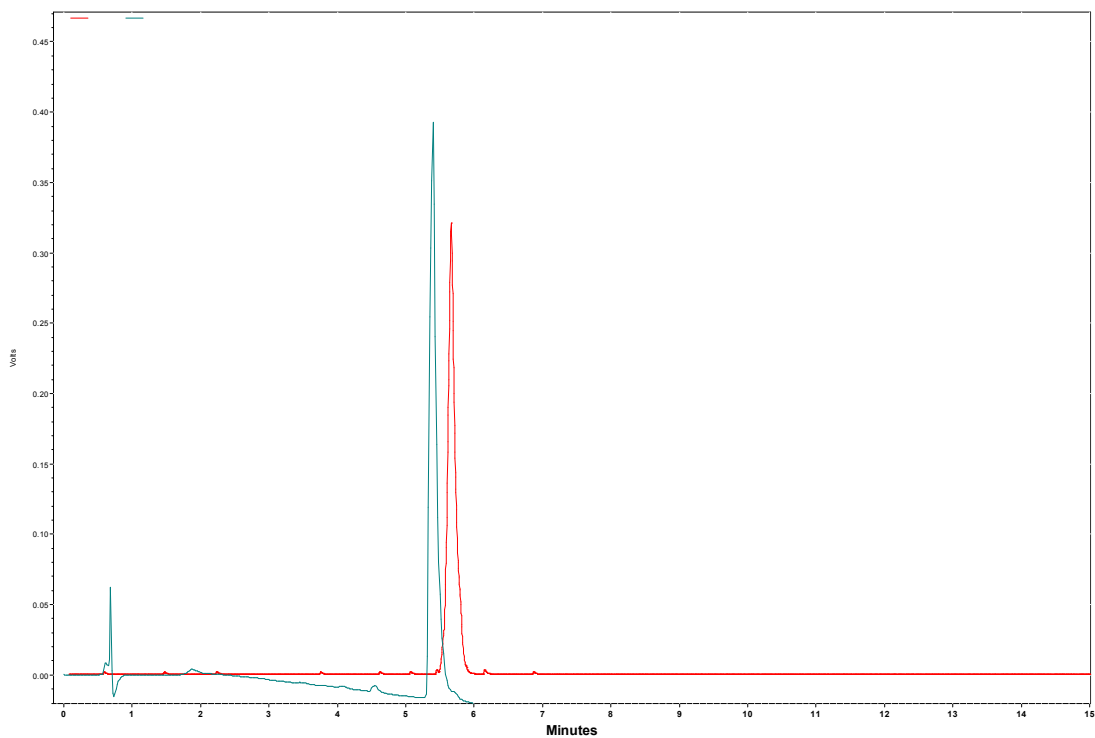

Figure 2: RadioHPLC chromatogram of purified [ $^{18}\text{F}$ ]F-Py-YGGFL, spiked with [ $^{19}\text{F}$ ]cold standard. Red is radioactive peak, green is UV at 254nm

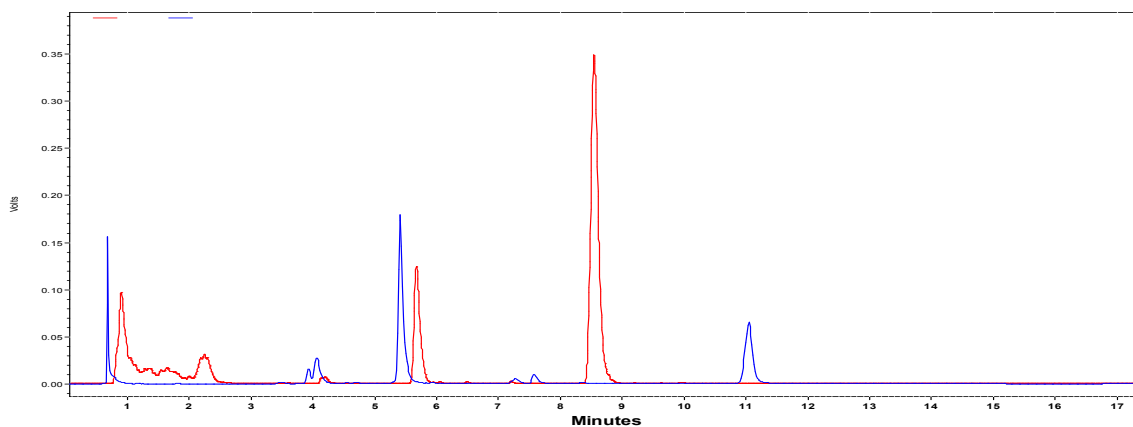

Figure 3: RadioHPLC chromatogram of crude radiolabeled peptide with cold standard co-injection. Red trace is radioactive trace, and blue is UV at 254 nm. C18 column with 9-81% acetonitrile in 0.05% TFA/water over 18 min gradient was used. Initial peak at solvent front corresponds to hydrolyzed [ $^{18}\text{F}$ ]F-Py-TFP ([ $^{18}\text{F}$ ]fluoronicotinic acid), peak at 2 min corresponds to unreacted  $^{18}\text{F}$ -fluoride, peak at 5.5 min corresponds to [ $^{18}\text{F}$ ]F-Py-TFP-YGGFL, and 8.5 min peak corresponds to unreacted [ $^{18}\text{F}$ ]F-Py-TFP.

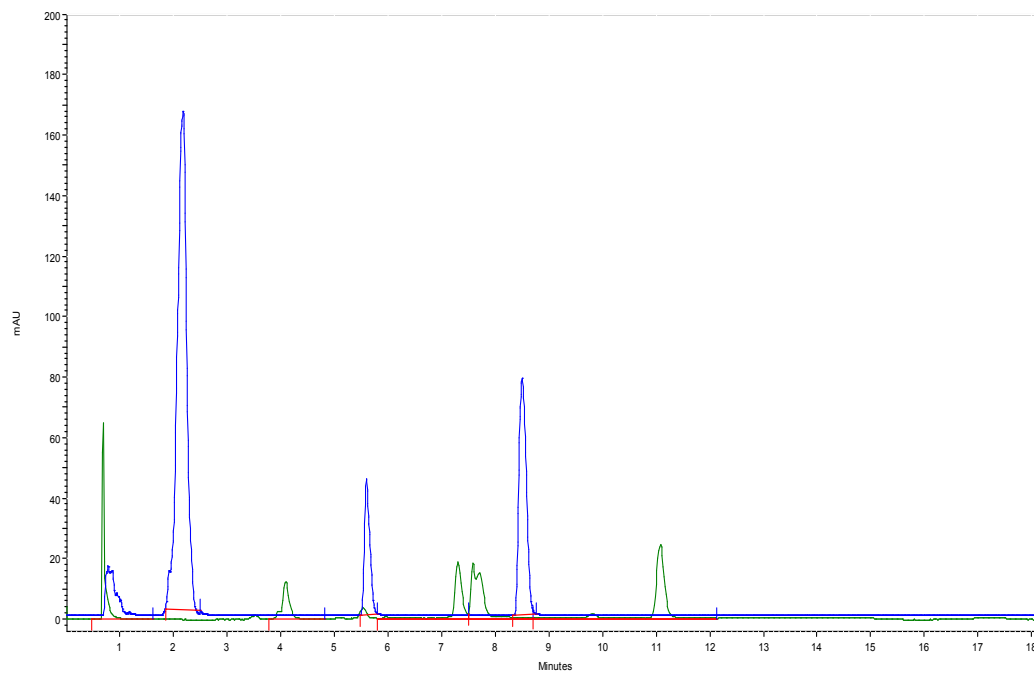

Figure 4: RadioHPLC chromatogram of crude radiolabeled peptide reaction without cold co-injection
